# Supplementary material
Source: publisher site journal article supplement (https://www.dovepress.com/article/302928)
Supplement: Supplementary file 1 [file get_supplementary_file.php]

**SUPPLEMENTARY MATERIAL**

**ONLINE SURVEY**

**Questions:**

**PART 1: General Questions**

1. Indicate your years of experience.
2. Approximately how many patients in total, encompassing all tumor types, have you personally treated in the last month?
3. How many of those patients were lung cancer patients?
4. Among lung cancer patients, how many presented non-small cell lung cancer (NSCLC) and how many small-cell lung cancer?
5. Of the NSCLC patients, could you indicate how many of them had metastatic disease?

**PART 2: “High tumor burden” definition-related questions**

1. In your experience with patients with metastatic NSCLC (mNSCLC) without actionable driver mutations (EGFR/ALK negative), what are the main factors that influence first-line treatment choice?
2. Of the factors shown, could you indicate to what extent you consider each of them important when deciding first-line treatment for a patient with non-mutated mNSCLC? Consider a scale from 1 to 7 where 1 is “Unimportant” and 7 “Important”.

- Eastern cooperative oncology group performance status (ECOG PS)
- Comorbidities
- Programmed death-ligand 1 (PD-L1) levels
- Symptoms
- “High tumor burden”
- Patient’s family support
- Availability for clinical trials
- Tumor mutational burden (TMB)
- Patient’s proximity to hospital

1. Based on your experience with mNSCLC patients without actionable driver mutations (EGFR/ALK negative), when prescribing first-line therapy, could you explain in your own words what factors you take into account when defining “high tumor burden”?
2. Of the following aspects, could you indicate to what extent you associate each of them with “high tumor burden”? Consider a scale from 1 to 7 where 1 is “I do not associate it with 'high tumor burden' at all” and 7 “I strongly associate it with 'high tumor burden'”.

- Number of metastatic lesions
- Location of metastases
- Sum of diameters of target lesions
- High lactate dehydrogenase (LDH) levels
- Presence of dyspnea
- ECOG PS >2
- Weight loss
- Presence of pain
- Presence of asthenia/fatigue

1. Could you please indicate which metastatic sites you consider to be associated with “high tumor burden”?
2. Indicate the minimum number of metastatic sites required to consider a patient to present “high tumor burden”.
3. In the first-line setting, indicate in which of the following specific case(s) you would consider a patient with mNSCLC without actionable driver mutations (EGFR/ALK negative) to present “high tumor burden”.

- Patients with one metastatic site
- Patients with two metastatic sites
- Patients with three metastatic sites

1. In patients with one metastatic site, indicate in which of the following specific case(s) you would consider a patient with mNSCLC without actionable driver mutations (EGFR/ALK negative) to present “high tumor burden” in the first-line setting.

- Patients with brain metastasis
- Patients with liver metastasis
- Patients with lung metastasis
- Patients with bone metastasis

1. In patients with two metastatic sites, indicate in which of the following specific case(s) you would consider a patient with mNSCLC without actionable driver mutations (EGFR/ALK negative) to present “high tumor burden” in the first-line setting.

- Patients with brain and liver metastases
- Patients with liver and bone metastases
- Patients with brain and lung metastases
- Patients with liver and lung metastases
- Patients with brain and bone metastases
- Patients with lung and bone metastases

1. In patients with three metastatic sites, indicate in which of the following specific case(s) you would consider a patient with mNSCLC without actionable driver mutations (EGFR/ALK negative) to present “high tumor burden” in the first-line setting.

- Patients with liver, brain and lung metastases
- Patients with liver, brain and bone metastases
- Patients with liver, lung and bone metastases

1. Based on LDH levels, indicate the minimum levels above which you would consider a patient to present “high tumor burden”.
2. Please, indicate the minimum sum of diameters of target lesions above which you would consider a patient to present “high tumor burden”.
3. Please, indicate the minimum percentage of weight loss above which you would consider a patient to present “high tumor burden”.
4. Please, indicate other symptoms or clinical features that, in your opinion, define the concept of “high tumor burden”.
